# Supplementary material for: Reducing the surface defects of Ta3N5 photoanode towards enhanced photoelectrochemical water oxidation
Source: Royal Society of Chemistry journal article supplement (doi:10.1039/d0ta08121c), 2020-01-01
Supplement: d0ta08121c1.pdf [file d0ta08121c1.pdf]

## Supporting Information

### **Reducing the surface defects of Ta<sub>3</sub>N<sub>5</sub> photoanode towards enhanced photoelectrochemical water oxidation**

Chenyi Shao<sup>a,b</sup>, Ruotian Chen<sup>a</sup>, Yongle Zhao<sup>a,b</sup>, Zheng Li<sup>a</sup>, Xu Zong<sup>a,\*</sup>, Can Li<sup>a,\*\*</sup>

<sup>a</sup>State Key Laboratory of Catalysis, Dalian Institute of Chemical Physics, Chinese Academy of Sciences, Dalian National Laboratory for Clean Energy, the Collaborative Innovation Center of Chemistry for Energy Materials (iChEM), Zhongshan Road 457, Dalian 116023, China.

<sup>b</sup>University of Chinese Academy of Sciences, Beijing 100049, China.

\*Corresponding author. *E-mail address*: [xzong@dicp.ac.cn](mailto:xzong@dicp.ac.cn) (Prof. X. Zong)

\*\*Corresponding author. *E-mail address*: [canli@dicp.ac.cn](mailto:canli@dicp.ac.cn) (Prof. C. Li)

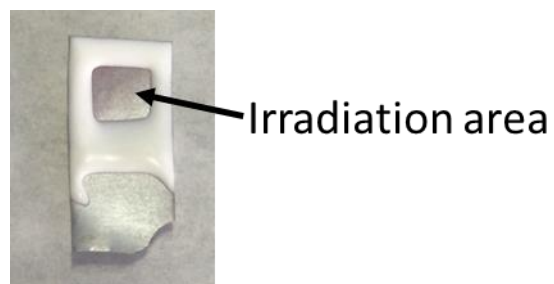

**Fig. S1** The photograph of  $\text{Co}(\text{OH})_x/\text{Ta}_3\text{N}_5$ -15-15 photoanodes.

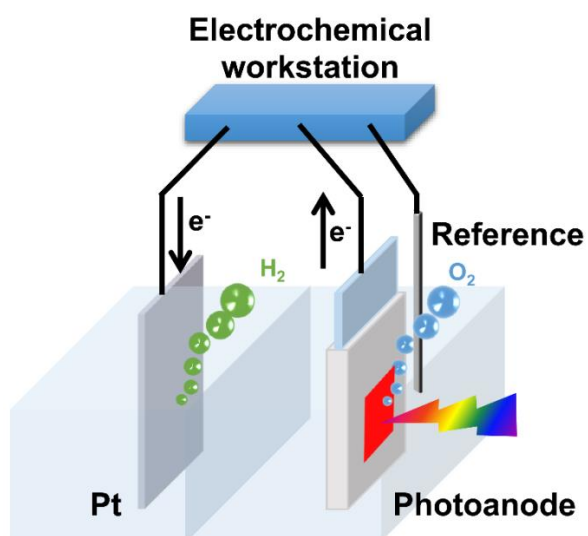

**Fig. S2** Schematic diagrams of PEC measurement system.

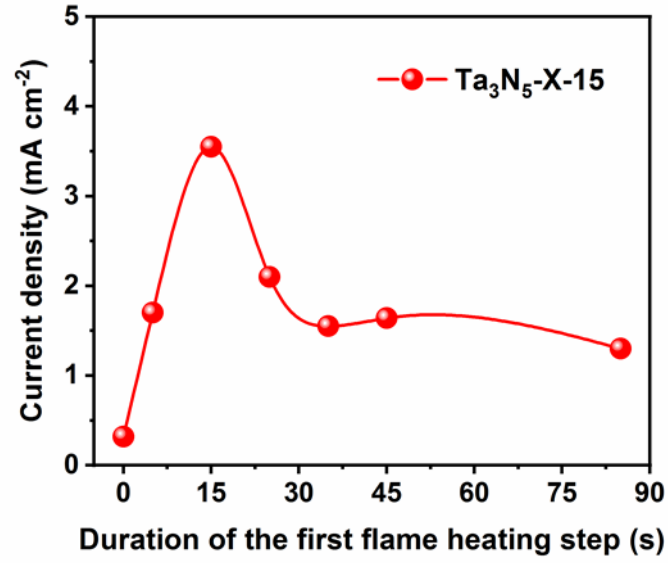

**Fig. S3** Dependence of the photocurrent density of Ta<sub>3</sub>N<sub>5</sub>-X-15 measured at 1.23 V vs. RHE on the duration of the first flame heating step.

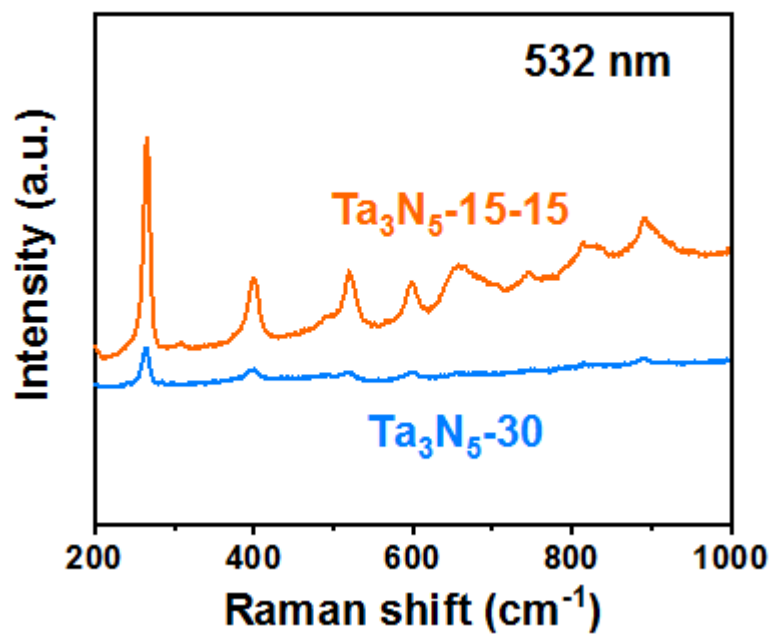

**Fig. S4** The visible Raman spectra of Ta<sub>3</sub>N<sub>5</sub>-30 and Ta<sub>3</sub>N<sub>5</sub>-15-15; exciting source: 532 nm laser.

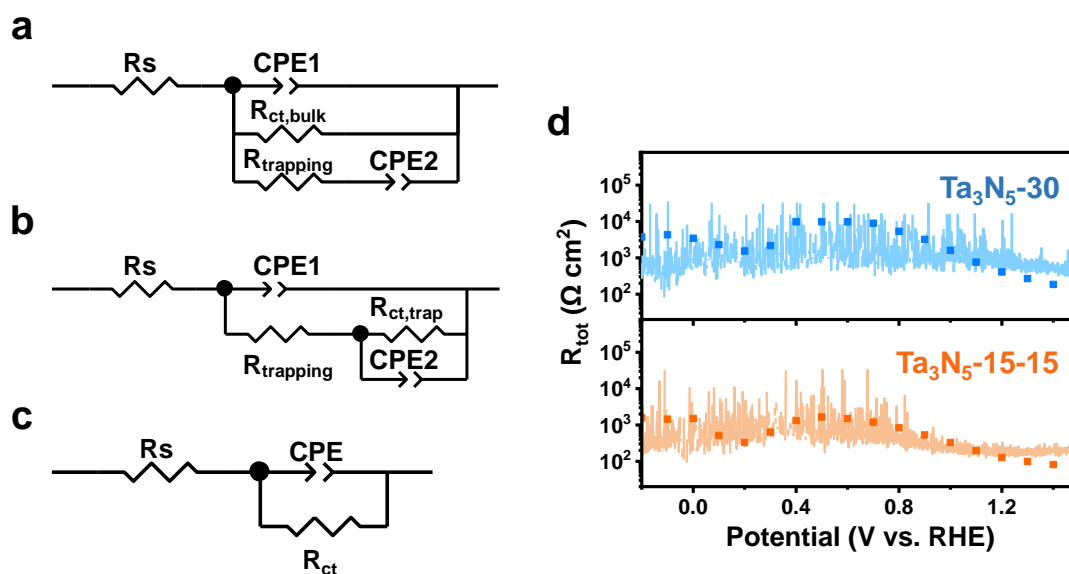

**Fig. S5** The equivalent AC circuits for the simulation of PEIS data showing two time constants: circuit in a) approximates the situation that photogenerated holes injected into the electrolyte are mainly transferred through the valence band of Ta<sub>3</sub>N<sub>5</sub>; circuit in b) approximates the situation that photogenerated holes injected into the electrolyte are mainly transferred through the surface states. c) Randles circuit. The assignment was made as follows.  $R_s$  was the series resistance attributed to the resistances of electrolyte and the substrate;  $R_{trapping}$  was the trapping resistance related with the charge recombination at surface states;  $R_{ct}$  was the charge transfer resistance at the semiconductor/electrolyte interface.  $R_{ct,bulk}$  was the charge transfer resistance at the semiconductor/electrolyte interface when photogenerated holes injected into the electrolyte are mainly transferred through the valence band of Ta<sub>3</sub>N<sub>5</sub>;  $R_{ct,trap}$  was the charge transfer resistance at the semiconductor/electrolyte interface when photogenerated holes injected into the electrolyte are mainly transferred through surface states; the capacitance of the bulk for Ta<sub>3</sub>N<sub>5</sub> photoanode ( $C_{bulk}$ ) was incorporated into the EC by a constant phase element (CPE1), which

considers the space charge region; the capacitance of the surface states ( $C_{ss}$ ) was calculated through a constant phase element (CPE2). d) Comparison of total resistance values ( $R_{tot}$ ) obtained by PEIS simulations (squares) and those by calculating  $dV/dJ$  from the  $J(V)$  curves in Fig. S7 (lines). The colors correspond to different samples:  $Ta_3N_5-30$  (blue) and  $Ta_3N_5-15-15$  (orange).

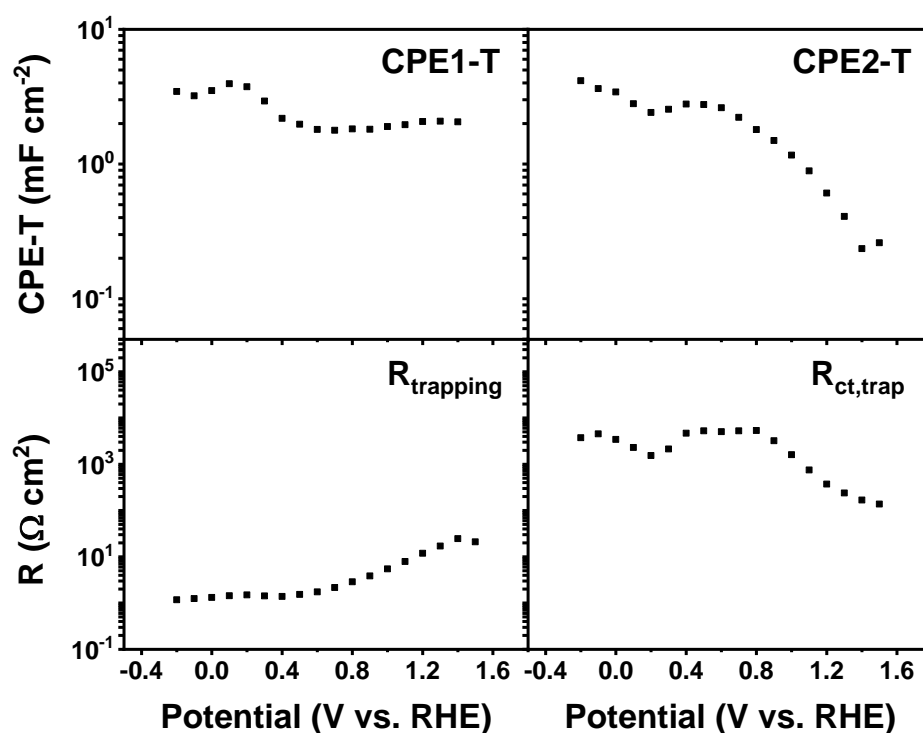

**Fig. S6** CPE-T and resistance values obtained on Ta<sub>3</sub>N<sub>5</sub>-30 when the PEIS data in Fig. 5a,b are modeled using the equivalent circuit shown in Fig. S5b. The results are almost identical with that (Fig. 6) obtained on Ta<sub>3</sub>N<sub>5</sub>-30 using the equivalent circuit shown in Fig. S5a.

Both equivalent circuits shown in Fig. S5a,b were employed to fit the EIS data of Ta<sub>3</sub>N<sub>5</sub>-30 in Fig. 5a,b. The results obtained with both circuits exhibit similar values for CPE1-T, CPE2-T, and  $R_{\text{trapping}}$ . However, it is more convincing that  $R_{\text{ct,bulk}}$  which is physically related with CPE-1 (represent the capacitance of the bulk) shows a valley corresponding to the peak observed in CPE-1, rather than  $R_{\text{ct,trap}}$  which is not directly physically related to CPE-1. Therefore, the equivalent circuit shown in Fig. S5a is more preferable than that in Fig. S5b. In other words, in Ta<sub>3</sub>N<sub>5</sub> photoanodes, the photogenerated holes injected into the electrolyte are mainly transferred from the

valance band and the surface states function as charge recombination centers. Hence, the equivalent circuit shown in Fig. S5a was used to derive the data which is discussed within this paper.



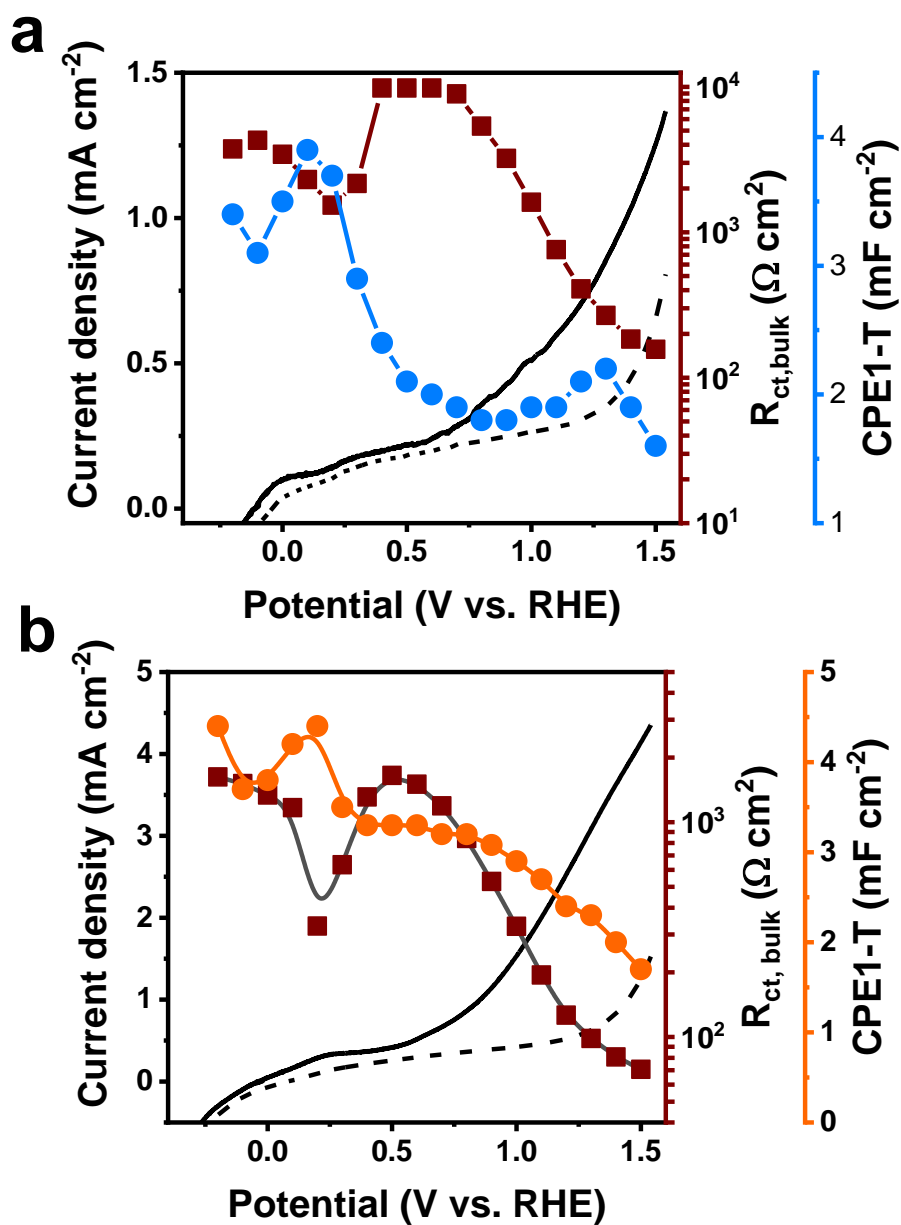

**Fig. S7** LSV curves acquired under illumination (black solid line) and in the dark (black dashed line),  $R_{ct,bulk}$  (squares), and CPE1-T (circles) obtained on a) Ta<sub>3</sub>N<sub>5</sub>-30 and b) Ta<sub>3</sub>N<sub>5</sub>-15-15 in 1.0 M NaOH (pH 13.6). Illumination: AM 1.5G.

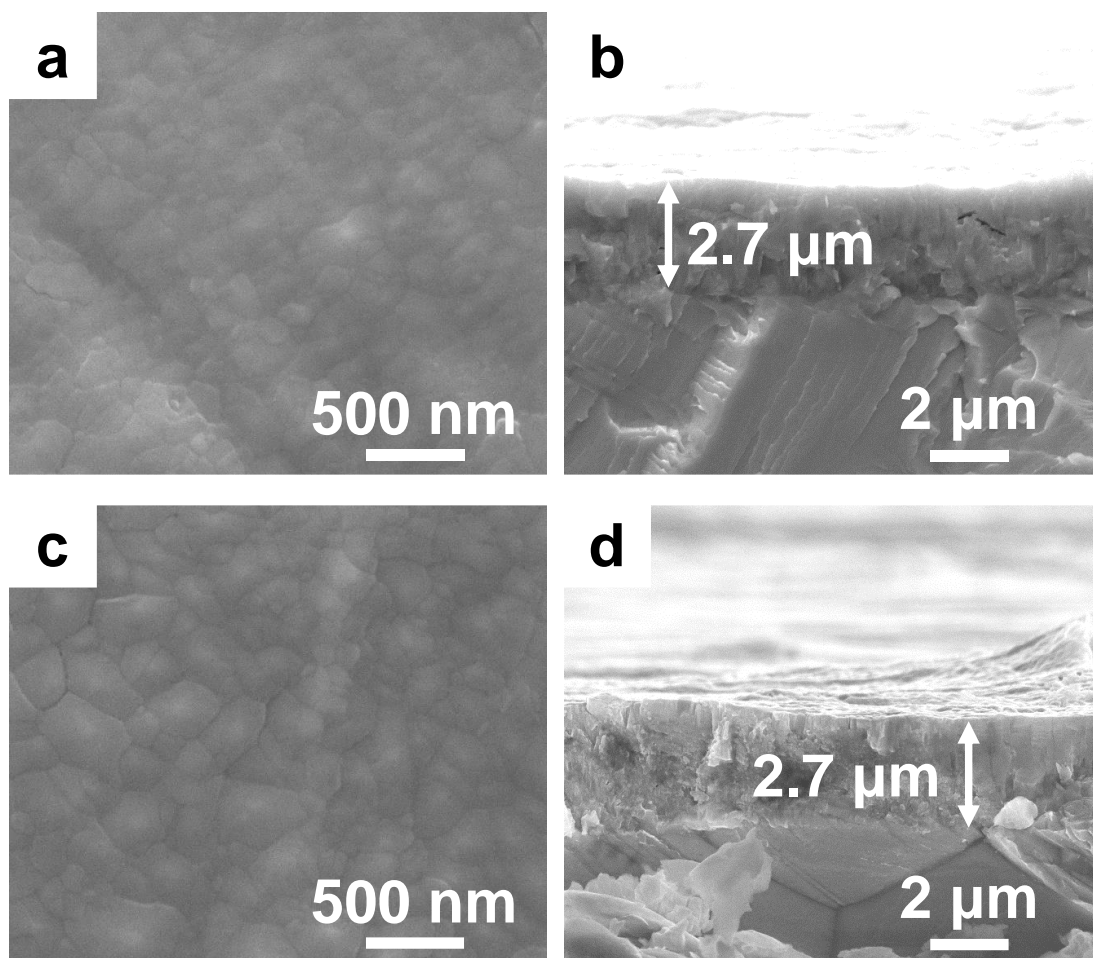

**Fig. S8** Top and cross-sectional SEM images of a,b) Ta<sub>2</sub>O<sub>5</sub>-15-15 and c,d) Ta<sub>2</sub>O<sub>5</sub>-30.
